# Supplementary material for: The cargo adapter protein CLINT1 is phosphorylated by the Numb-associated kinase BIKE and mediates dengue virus infection
Source: PubMed Central journal article supplement (PMC9133654; doi:10.1016/j.jbc.2022.101956), 2022-04-20

**Fig S4**

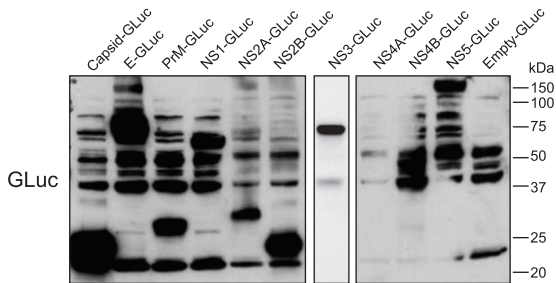

Supplement: mmc9.pdf [file mmc9.pdf]
