# Supplementary material for: The cargo adapter protein CLINT1 is phosphorylated by the Numb-associated kinase BIKE and mediates dengue virus infection
Source: PubMed Central journal article supplement (PMC9133654; doi:10.1016/j.jbc.2022.101956), 2022-04-20

# Fig S5

A

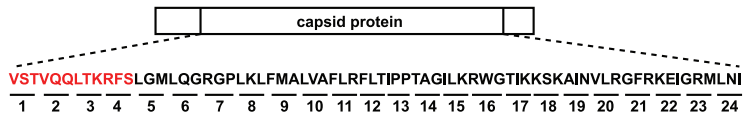

B

$$\text{WT } \frac{\text{PFU}}{\text{mL}} = 1.5 \times 10^7$$

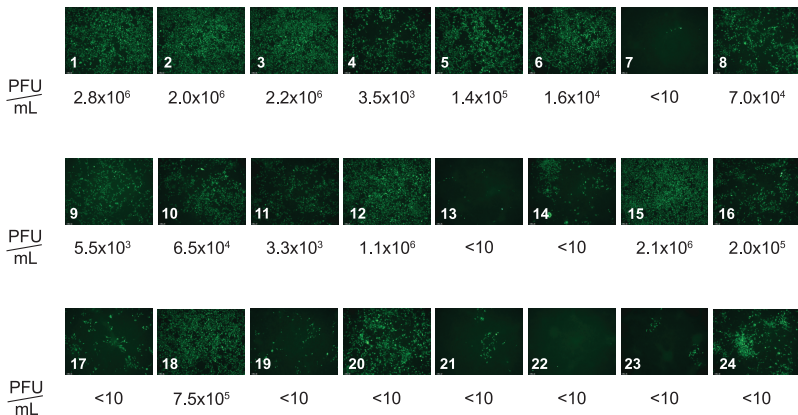

Supplement: mmc10.pdf [file mmc10.pdf]
